# Supplementary material
Source: PubMed Central journal article supplement (PMC4897188)
Supplement: cr201663x2.pdf [file cr201663x2.pdf]

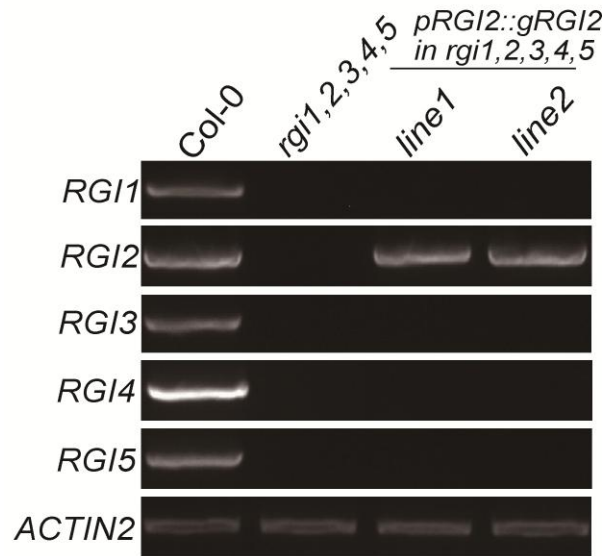

**Supplementary information, Figure S2** Confirmation of two independent lines of transgenic plants, harboring *pRGI2::gRGI2* in *rig1,2,3,4,5* by RT-PCR analysis.
