# Supplementary material
Source: PubMed Central journal article supplement (PMC4897188)
Supplement: cr201663x5.pdf [file cr201663x5.pdf]

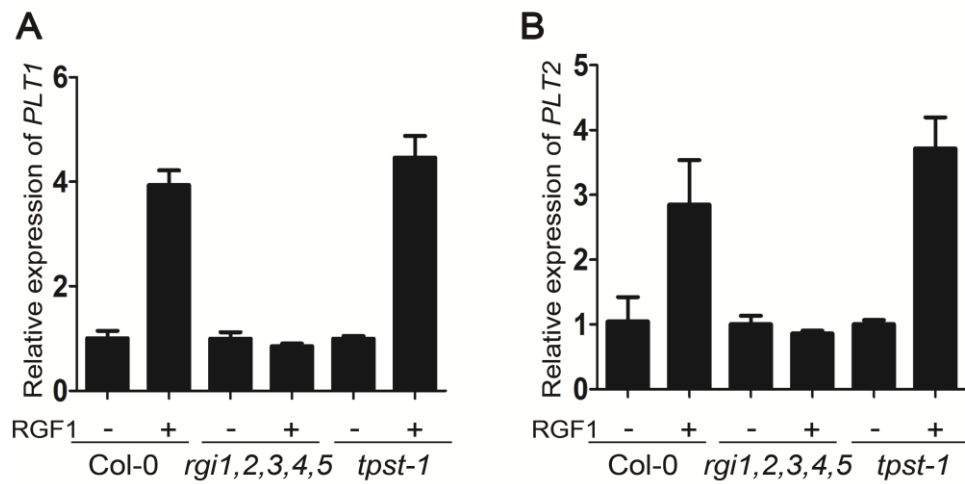

**Supplementary information, Figure S5** The expression levels of *PLT1* and *PLT2* cannot be induced in *rgi1,2,3,4,5* but can be induced in Col-0 and *tpst-1* by RGF1 treatment.

(A) Relative expression levels of *PLT1*. In each of the genotypes, the expression of untreated seedlings was set to 1. Five-day-old seedlings were used for the analysis.

(B) Relative expression levels of *PLT2*. In each of the genotypes, the expression of untreated seedlings was set to 1. Five-day-old seedlings were used for the analysis.
