# Supplementary material
Source: PubMed Central journal article supplement (PMC4897188)
Supplement: cr201663x6.pdf [file cr201663x6.pdf]

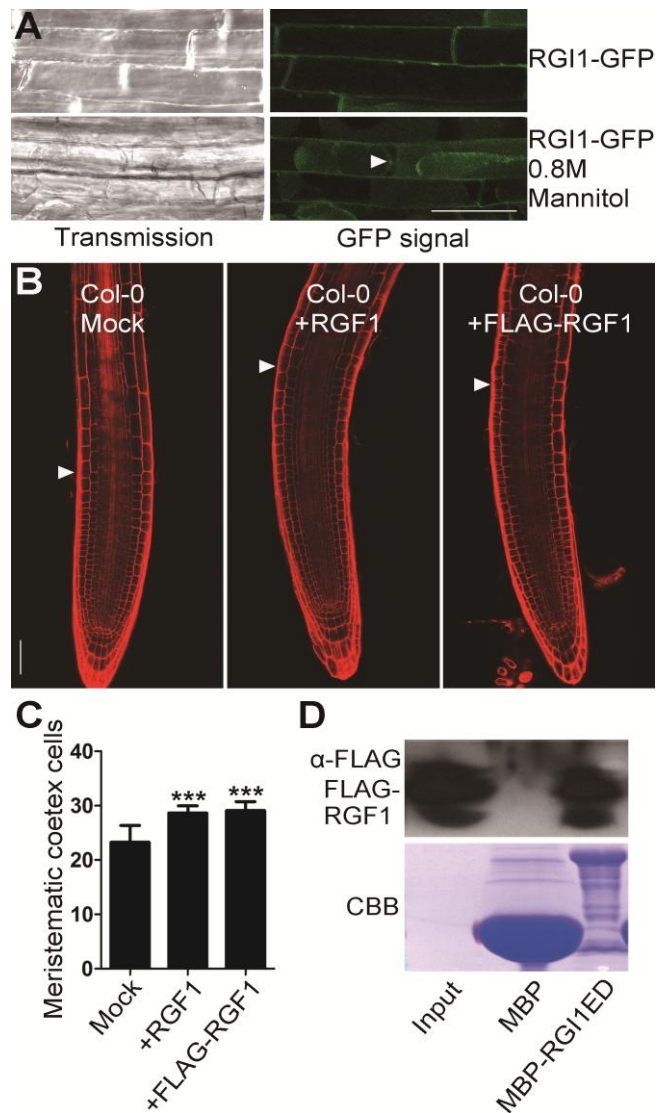

**Supplementary information, Figure S6** Subcellular localization of RGI1, biological activity assay of synthetic sulfated FLAG-RGF1, and pull-down analysis of FLAG-RGF1 and RGI1.

(A) Subcellular localization of RGI1-GFP before and after plasmolysis. Size bar represents 50  $\mu$ m.

(B) Physiological analyses indicated that FLAG-RGF1 possesses biological activity similar to RGF1.

Size bar represents 50  $\mu$ m.

(C) Measurements of meristematic cortex numbers before and after RGF1 or FLAG-RGF1 treatment. Data shown represent average and SD (n>10). \*\*\* represents  $p < 0.001$ .

(D) Pull-down assay indicated that MBP cannot interact with FLAG-RGF1, but MBP-RGI1ED can interact with FLAG-RGF1.
