# Supplementary material
Source: PubMed Central journal article supplement (PMC4897188)
Supplement: cr201663x7.pdf [file cr201663x7.pdf]

**Supplementary information, Supplemental Table 1. Primers used in this work**

| Primer name   | Sequence (5' to 3')                                                   |
|---------------|-----------------------------------------------------------------------|
| pSHR-attB1-F  | <u>GGGACAAGTTTGTACAAAAAAGCAGGCTAGAGGTTAGGAGGCAAAG</u>                 |
| pSHR-attB2-R  | <u>GGGACCACTTTGTACAAGAAAGCTGGGTTTTTTTTTTTAAATGAATAAGAAAATG</u><br>AAT |
| pSCR-attB1-F  | <u>GGGACAAGTTTGTACAAAAAAGCAGGCTCGTAGAAAGCGTGGATGG</u>                 |
| pSCR-attB2-R  | <u>GGGACCACTTTGTACAAGAAAGCTGGGTGGAGATTGAAGGGTTGTTGGT</u>              |
| pWOX5-attB1-F | <u>GGGACAAGTTTGTACAAAAAAGCAGGCTTCCTTTCTATTTCTGCTGGTG</u>              |
| pWOX5-attB2-R | <u>GGGACCACTTTGTACAAGAAAGCTGGGTGTTTCAGATGTAAAGTCCTCAACT</u>           |
| pRG12-F       | <u>GCTCTGTTGGCCCAAGCTGAGGAGGGGTAGATATAAGTGGGTGT</u>                   |
| pRG12-R       | <u>TTTTGTACAACTTGTGAAGAGTTTTTTTCTTTCATTGGCT</u>                       |
| RG11 attB1-F  | <u>GGGACAAGTTTGTACAAAAAAGCAGGCTTCATGTCTCTTCATTCCTAATCTTCT</u>         |
| RG11 attB2-R  | <u>GGGACCACTTTGTACAAGAAAGCTGGGTCCTCGATTGAAGAAGAAGAAGAGTA</u><br>A     |
| RG12 attB1-F  | <u>GGGACAAGTTTGTACAAAAAAGCAGGCTTCATGTCTTGC AAATGCCGAT TCCA</u>        |
| RG12 attB2-R  | <u>GGGACCACTTTGTACAAGAAAGCTGGGTCCTTAAGATTGGTCTAACATTAGAAG</u><br>T    |
| PLT2 attB1-F  | <u>GGGACAAGTTTGTACAAAAAAGCAGGCTTCATGAATTCTA ACAACTGGCT CGC</u><br>GT  |
| PLT2 attB2-R  | <u>GGGACCACTTTGTACAAGAAAGCTGGGCTTCATCCACATCGTGAAAACATT</u>            |
| ACTIN2 RT-F   | CAGTGGTCGTACAACCGGTATTG                                               |
| ACTIN2 RT-F   | TGCTGTGATTTCTTTGCTCATACG                                              |
| RG11 RT-F     | GAGCAGAACCCGGAAGCTTCTATCCTT                                           |
| RG11 RT-F     | TCACTCGATTGAAGAAGAAGAAGAGTAA                                          |
| RG12 RT-F     | GAAACTGTAGGAATCTCAAGGTCT                                              |
| RG12 RT-R     | TTATTTAAGATTTGGTCTAACATTAGAAGT                                        |
| RG13 RT-F     | GGCGACGCTTTTTCTCCTGGCAC                                               |
